# Supplementary material for: Efficient visible-light-driven photocatalysis: simultaneous degradation of multiple pollutants with bismuth oxyhalide solid solutions
Source: Royal Society of Chemistry journal article supplement (doi:10.1039/d4ew00410h), 2024-01-01
Supplement: d4ew00410h1.pdf [file d4ew00410h1.pdf]

## Efficient Visible-Light-Driven Photocatalysis: Simultaneous Degradation of Multiple Pollutants with Bismuth Oxyhalide Solid Solutions

Helena Pérez del Pulgar<sup>a</sup>, Josefa Ortiz-Bustos<sup>a</sup>, Santiago Gómez-Ruiz<sup>a,b</sup>, Isabel del Hierro<sup>a,b\*</sup>, Yolanda Pérez<sup>a,c\*</sup>

<sup>a</sup> COMET-NANO group, Departamento de Biología y Geología, Física y Química Inorgánica, ESCET, Universidad Rey Juan Carlos, C/ Tulipán s/n, 28933 Móstoles (Madrid), Spain.

<sup>b</sup> Instituto de Investigación de Tecnologías para la Sostenibilidad. Universidad Rey Juan Carlos.

<sup>c</sup> Advanced Porous Materials Unit, IMDEA Energy, Av. Ramón de la Sagra 3, 28935 Móstoles, Madrid, Spain

E-mail: [yolanda.cortes@urjc.es](mailto:yolanda.cortes@urjc.es) ; [isabel.hierro@urjc.es](mailto:isabel.hierro@urjc.es)

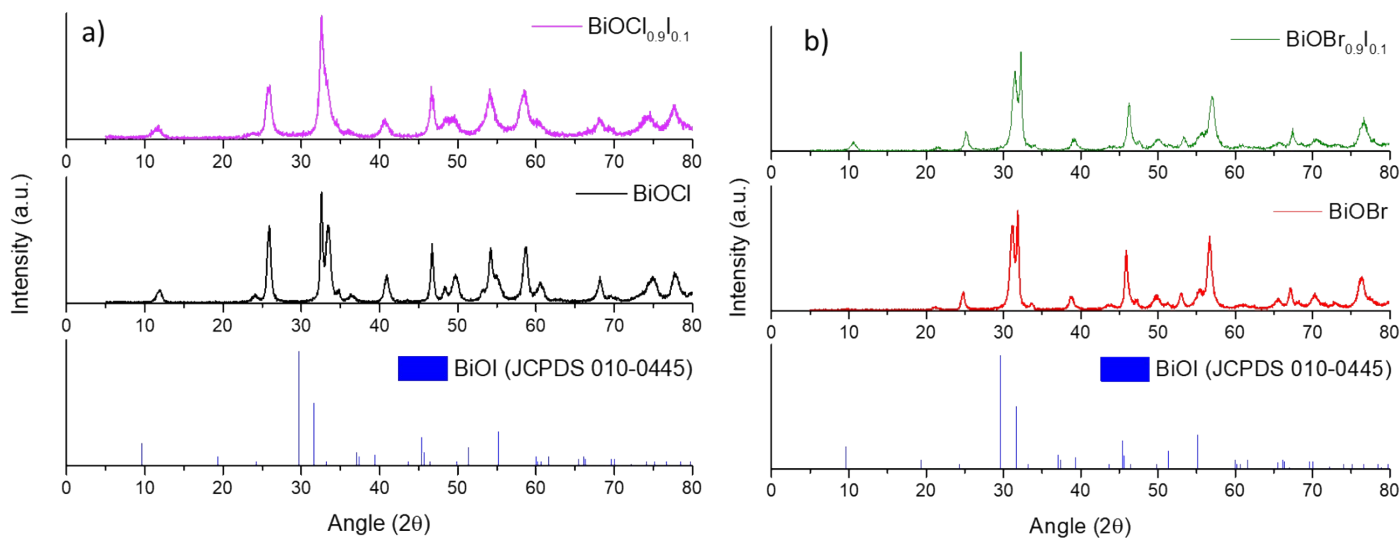

Figure S1 a) XRD spectra of BiOCl<sub>0.9</sub>I<sub>0.1</sub> and BiOCl samples and b) XRD spectra of BiOBr<sub>0.9</sub>I<sub>0.1</sub> and BiOBr samples, with the standard diffraction pattern of BiOI (JCPDS 010-0445).

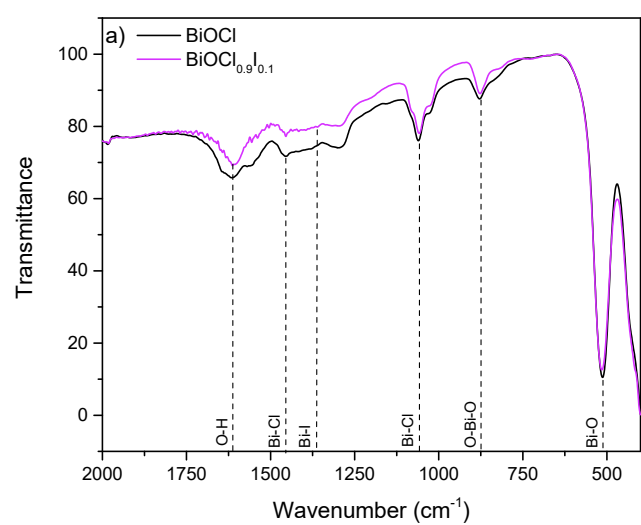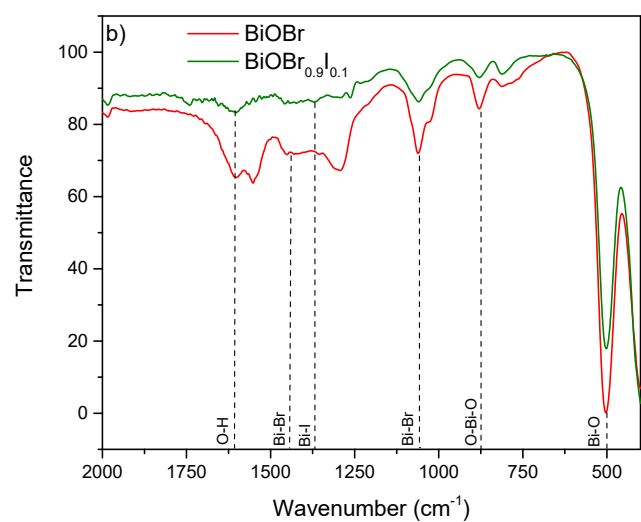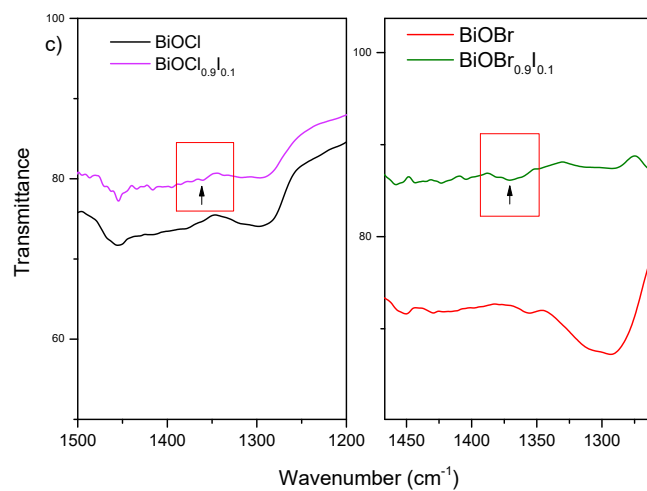

Figure S2. FT-IR spectra for a) bismuth oxychloride-based samples and b) bismuth oxybromide-based samples c) Zoom in the range 1200-1500 1366  $\text{cm}^{-1}$ .

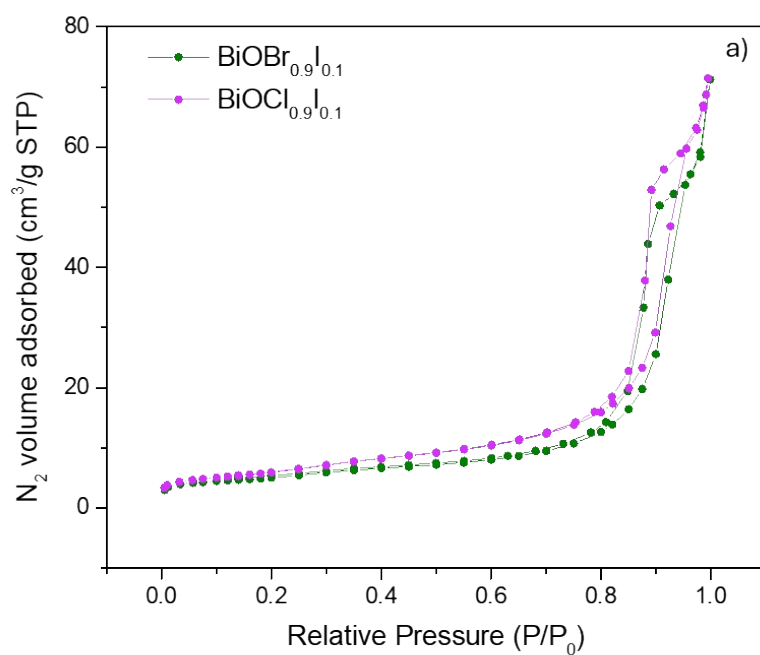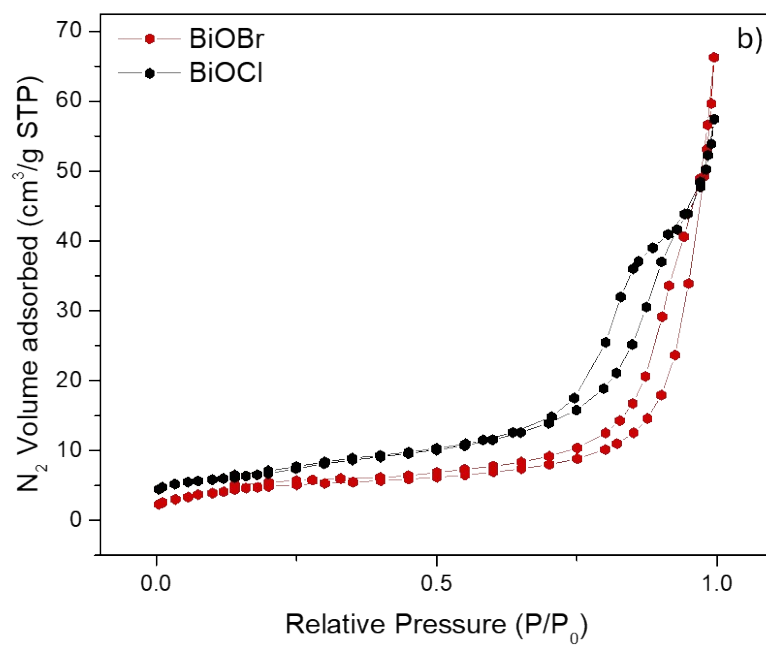

Figure S3.  $N_2$  adsorption-desorption isotherms of the  $BiOBr_{0.9}I_{0.1}$  and  $BiOCl_{0.9}I_{0.1}$  samples (a) and  $BiOCl$  and  $BiOBr$  (b).

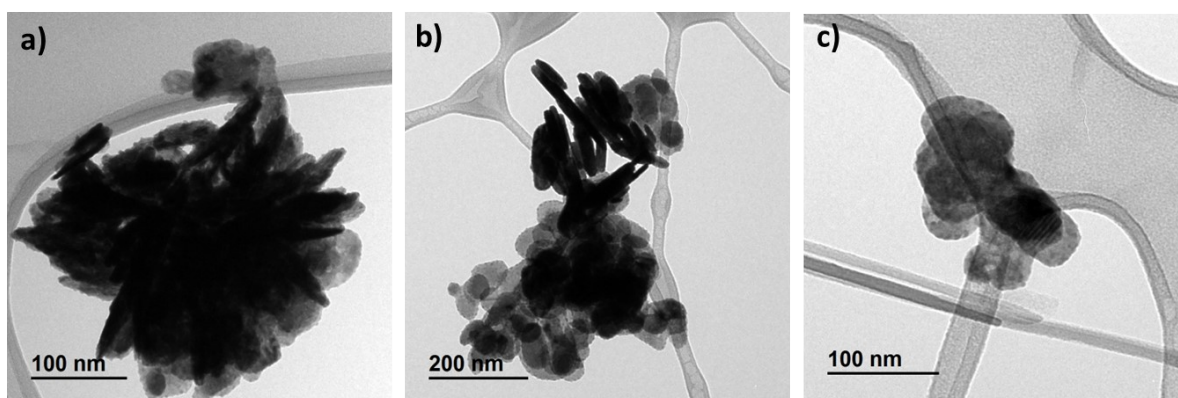

Figure S4. TEM images of  $\text{BiOCl}_{0.9}\text{I}_{0.1}$  (a) and  $\text{BiOBr}_{0.9}\text{I}_{0.1}$  (b) and (c)

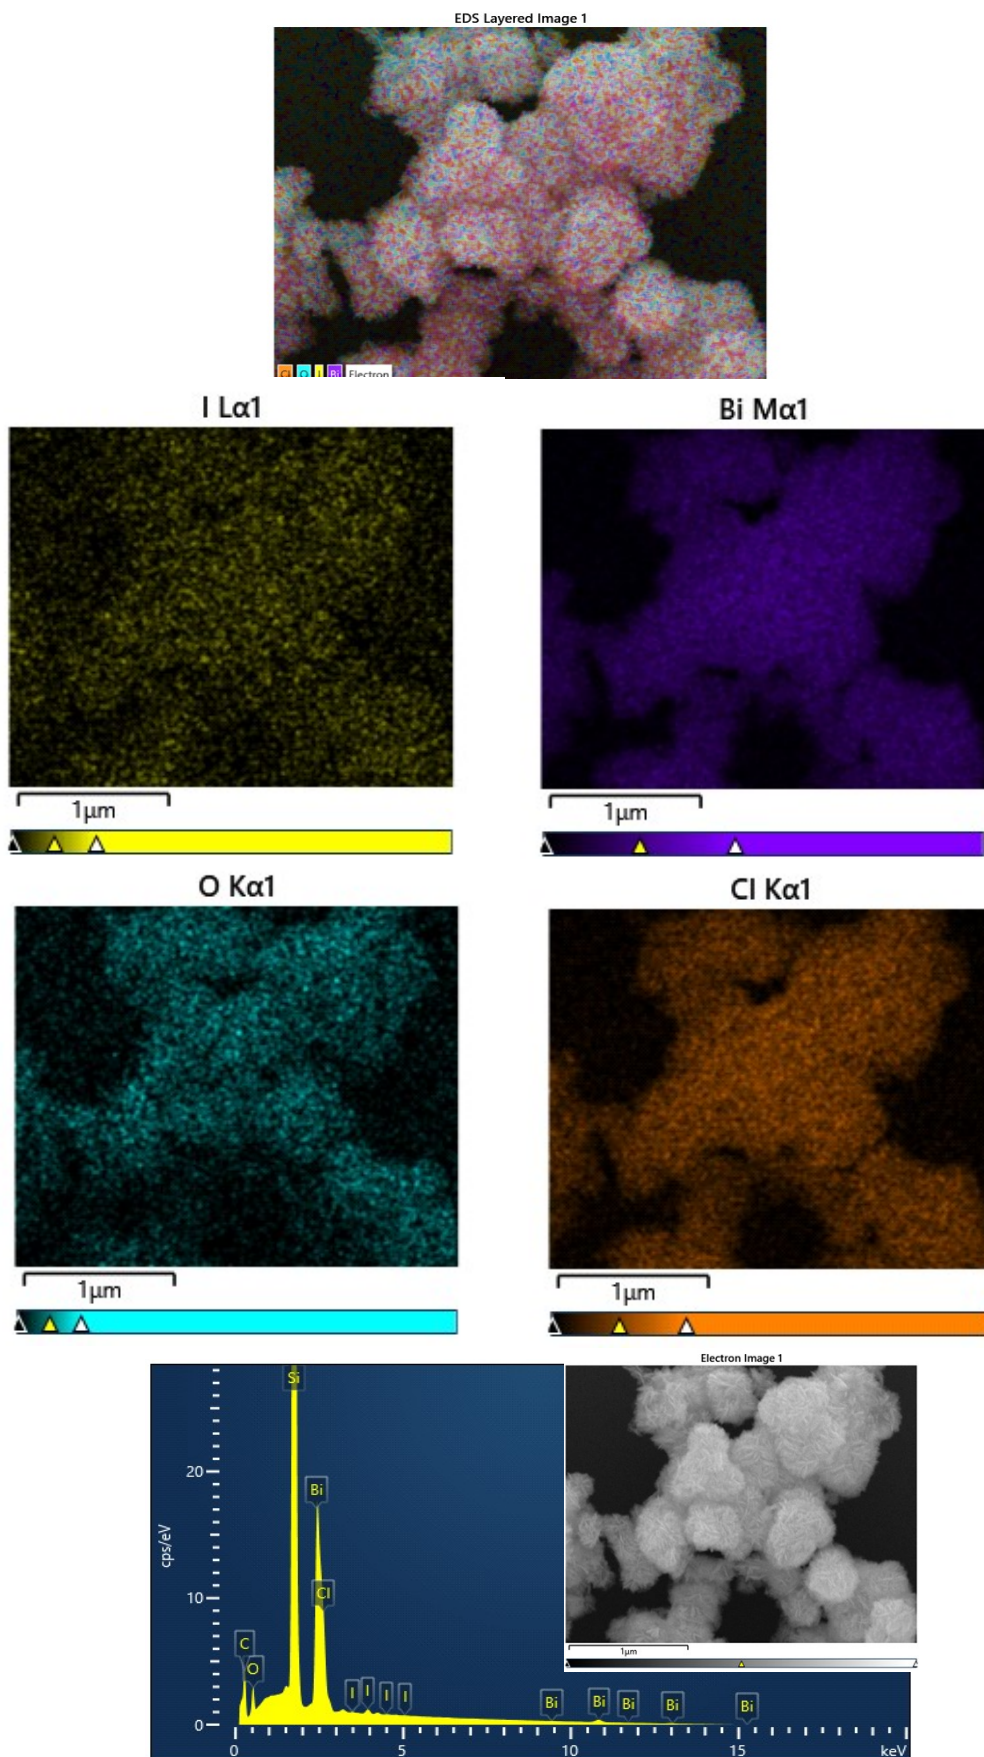

Figure S5. SEM/EDS images of the  $\text{BiOCl}_{0.9}\text{I}_{0.1}$  sample. The coloured spots are the different elements in the material: yellow (I), purple (Bi), blue (O) and brown (Cl)

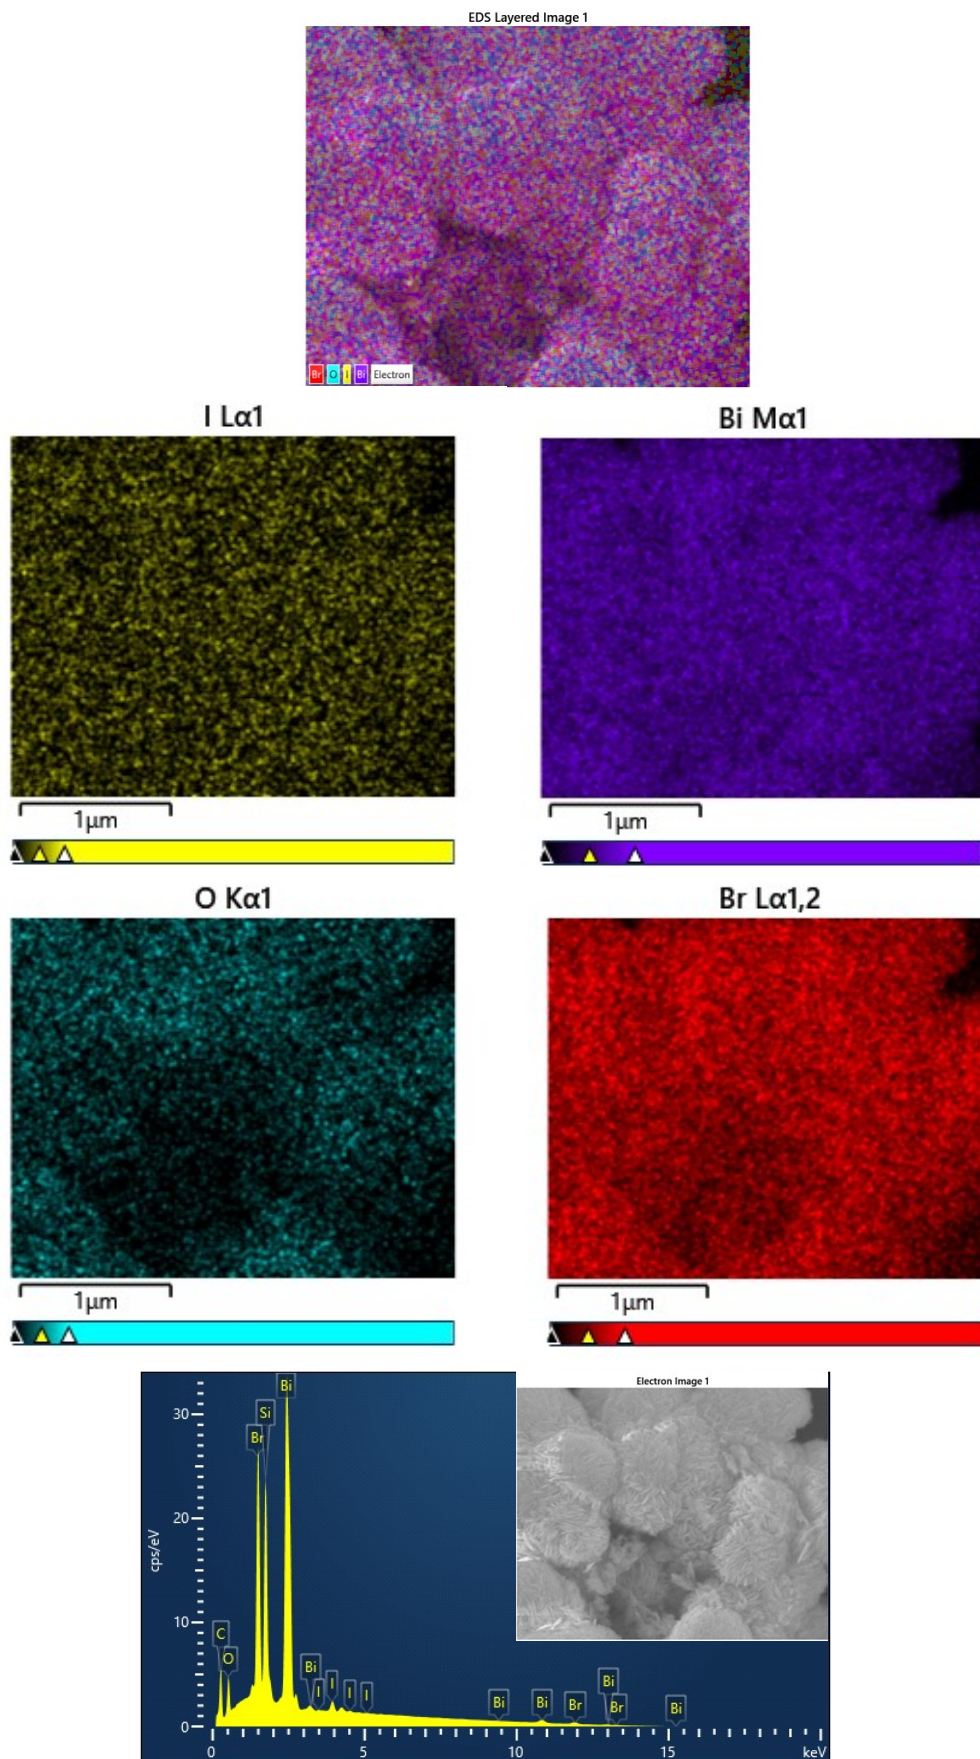

Figure S6. SEM/EDS images of the  $\text{BiOBr}_{0.9}\text{I}_{0.1}$  sample. The coloured spots are the different elements in the material: yellow (I), purple (Bi), blue (O) and red (Br)

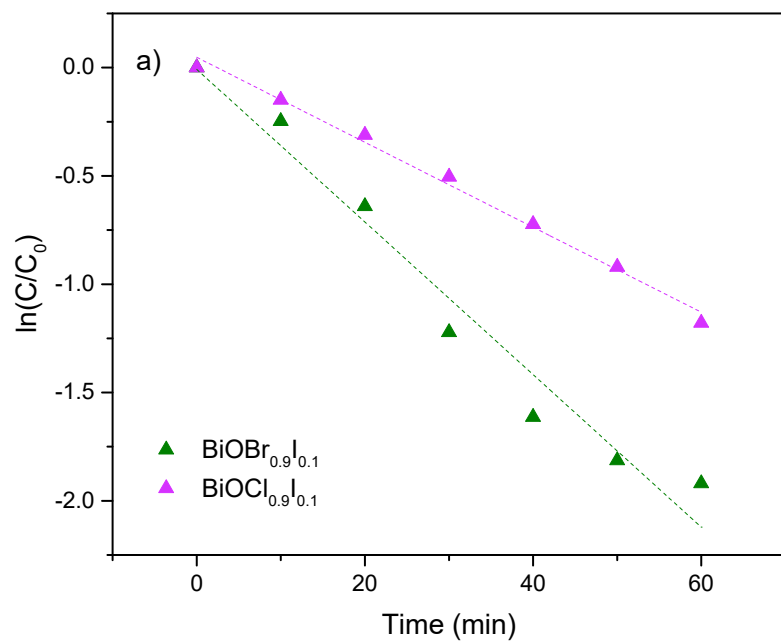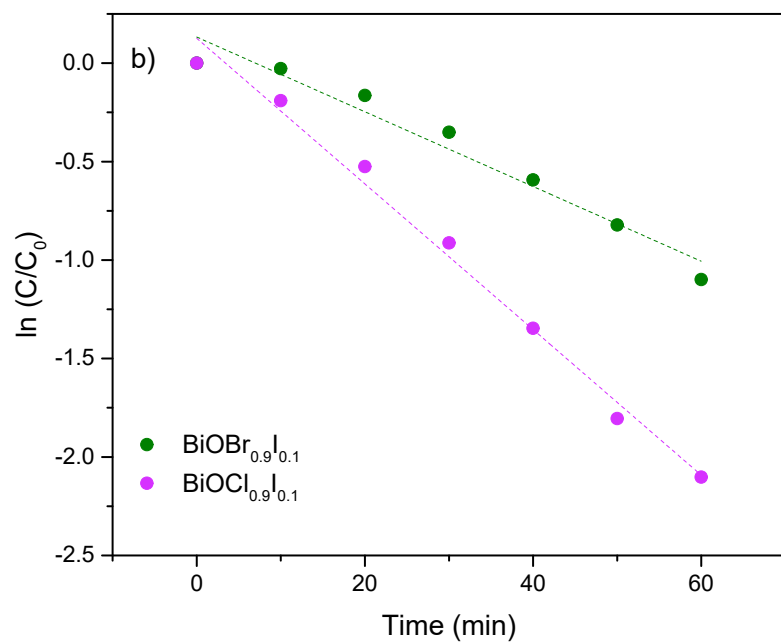

Fig. S7. Pseudo first-order kinetics of a) CIP and b) MP using bismuth oxyhalide solid solutions

Table S1. Comparison of single contaminant removal efficiencies

| Photocatalyst                                                       | Contaminant | $k$<br>( $\text{min}^{-1}$ ) | C<br>(ppm) | Removal<br>(%) | Light<br>source           | Time<br>(min) | Reference        |
|---------------------------------------------------------------------|-------------|------------------------------|------------|----------------|---------------------------|---------------|------------------|
| <b>BiOCl<sub>0.9</sub>I<sub>0.1</sub></b>                           | <b>MP</b>   | <b>0.037</b>                 | <b>10</b>  | <b>90</b>      | <b>Vis (300W Xe lamp)</b> | <b>60</b>     | <b>This work</b> |
| Ag/AgBr@m-WO <sub>3</sub>                                           | MP          | 0.00981                      | 10         | 80             | Vis (450 W Xe arc lamp)   | 180           | 1                |
| Fe <sub>2</sub> O <sub>3</sub> /BiVO <sub>3</sub> /biochar assembly | MP          | 0.020                        | 5          | 95.6           | Sunlight                  | 120           | 2                |
| Bi <sub>4</sub> O <sub>5</sub> Br <sub>2</sub>                      | MP          | 0.00356                      | 10         | 24.4           | Vis (1000 W Xe lamp)      | 60            | 3                |
| I <sub>1.0</sub> -Bi <sub>4</sub> O <sub>5</sub> Br <sub>2</sub>    | MP          | 0.0368                       | 10         | 90             | Vis (1000 W Xe lamp)      | 60            | 3                |
| <b>BiOBr<sub>0.9</sub>I<sub>0.1</sub></b>                           | <b>CIP</b>  | <b>0.035</b>                 | <b>15</b>  | <b>91.6</b>    | <b>Vis (300W Xe lamp)</b> | <b>60</b>     | <b>This work</b> |
| 3%BiVO <sub>4</sub> /TiO <sub>2</sub>                               | CIP         | 0.0215                       | 10         | 100            | Vis (300W Xe lamp)        | 120           | 4                |
| BiOBr/Bi <sub>4</sub> O <sub>5</sub> Br <sub>2</sub>                | CIP         | 0.015                        | 10         | 91             | Vis (500W Xe lamp)        | 150           | 5                |
| CuS/BiVO <sub>4</sub>                                               | CIP         | 0.0215                       | 10         | 90             | Vis (300W Xe lamp)        | 90            | 6                |
| BiVO <sub>4</sub> /Ag/MnO <sub>2</sub>                              | CIP         | 0.0275                       | 10         | 93.6           | Vis (300W Xe lamp)        | 100           | 7                |
| Ag-BiVO <sub>4</sub>                                                | CIP         | 0.02814                      | 10         | 98.2           | Solar light               | 120           | 8                |



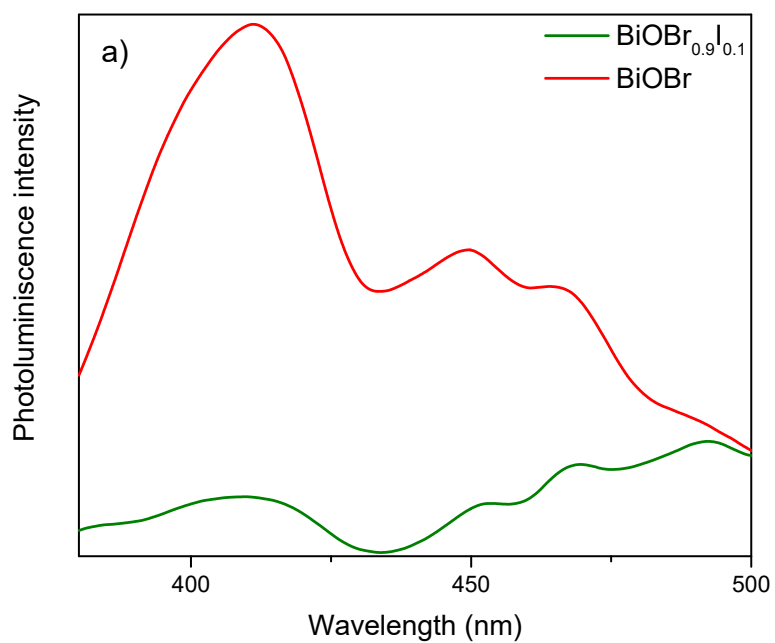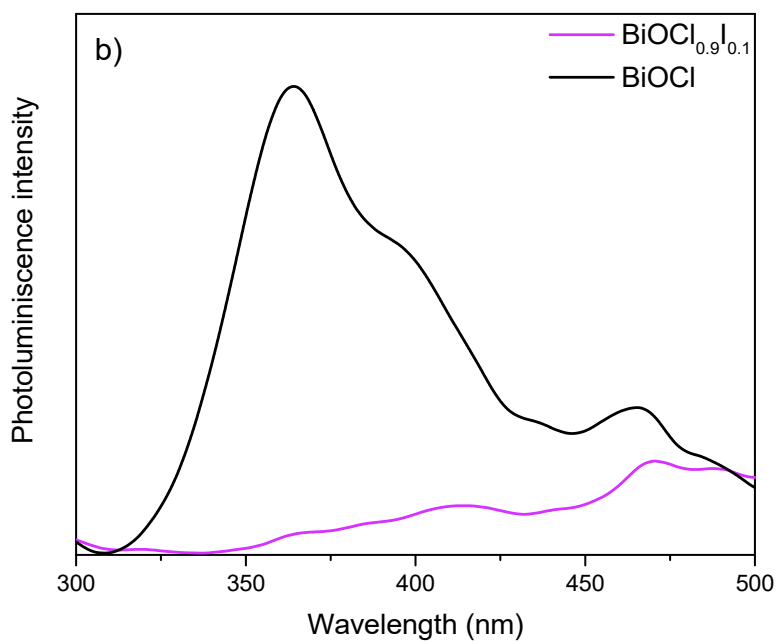

Figure S8. PL spectra of a) BiOBr-based samples upon excitation at 315 nm (cut wavelength 370 nm) and b) BiOCl-based samples upon excitation at 266 nm (cut wavelength 290 nm)

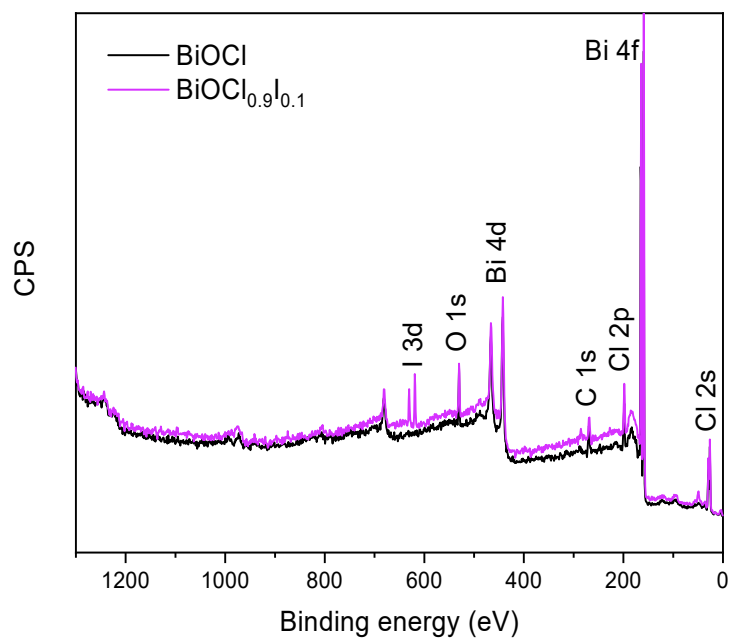

Figure S9. XPS survey spectra of bismuth oxychloride-based samples

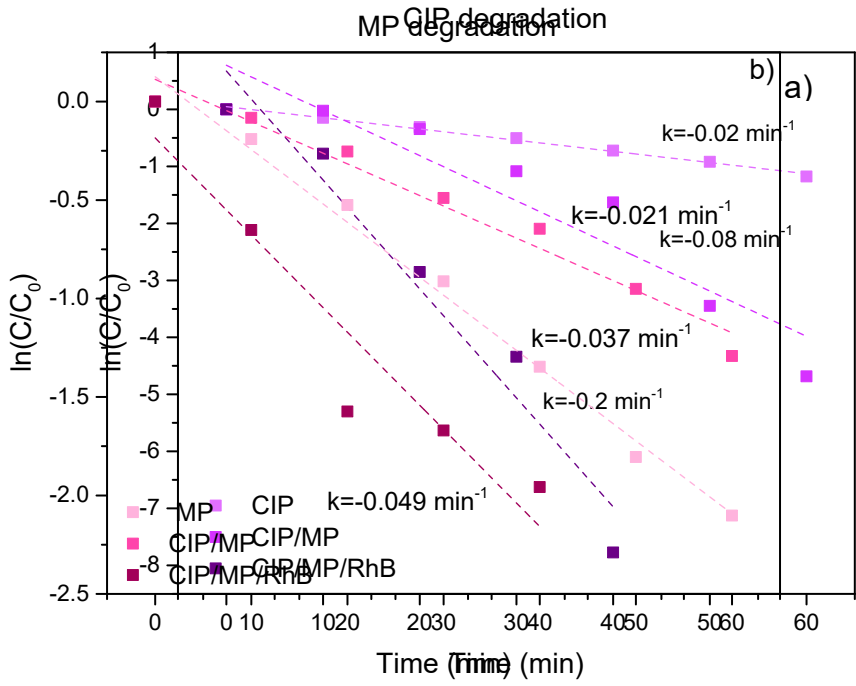

Figure S10. Pseudo first-order kinetics of a) CIP and b) MP degradation using  $\text{BiOCl}_{0.9}\text{I}_{0.1}$  in a single-, binary- (CIP/MP) and ternary-contaminant system (CIP/MP/RhB).

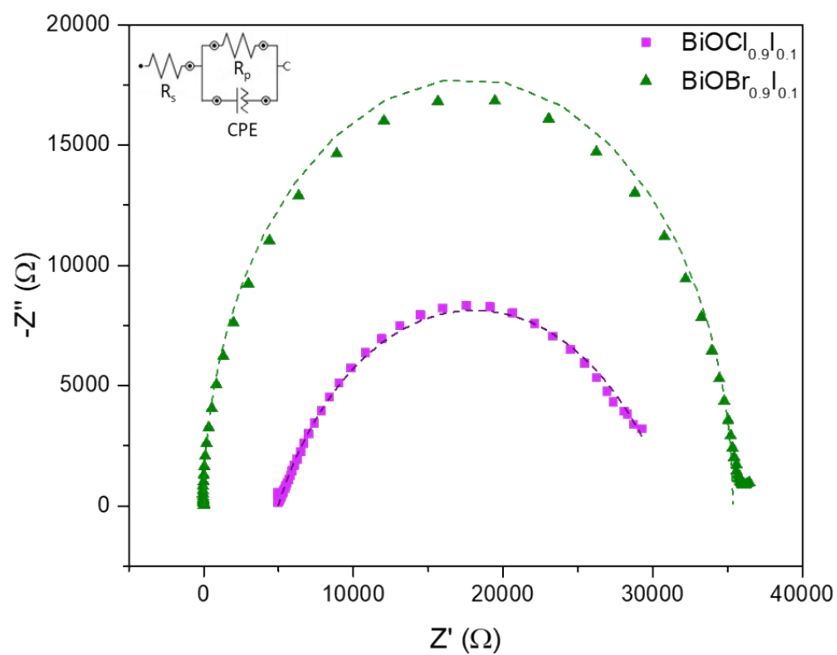

Figure S11. Electrochemical impedance measurements, Nyquist plots of  $\text{BiOX}_{0.9}\text{I}_{0.1}$  carbon paste electrodes

Table S2. Values obtained by the Randles model circuit fitting of EIS spectra of  $\text{BiOX}_{0.9}\text{I}_{0.1}$ .

| Material                           | $R_s$ (k $\Omega$ ) | $R_p$ (k $\Omega$ ) | CPE ( $\mu\text{Mho}\cdot\text{s}^N$ ) |
|------------------------------------|---------------------|---------------------|----------------------------------------|
| $\text{BiOCl}_{0.9}\text{I}_{0.1}$ | 4.89                | 26.2                | 6.86                                   |
| $\text{BiOBr}_{0.9}\text{I}_{0.1}$ | 27.0                | 35.3                | 96.4                                   |

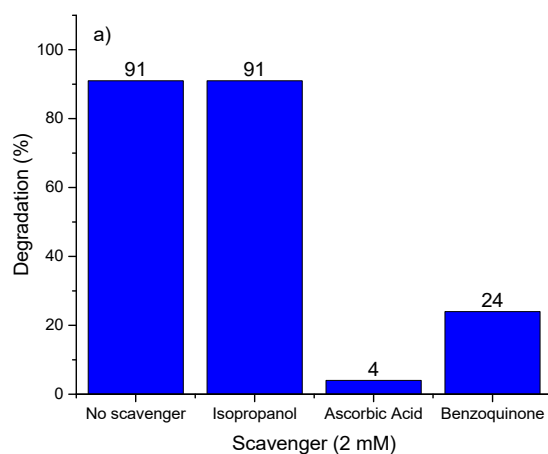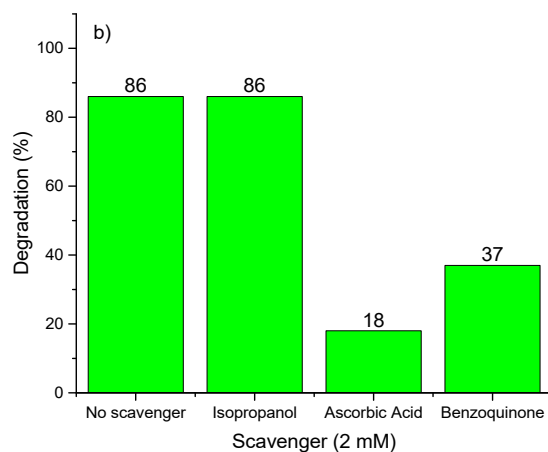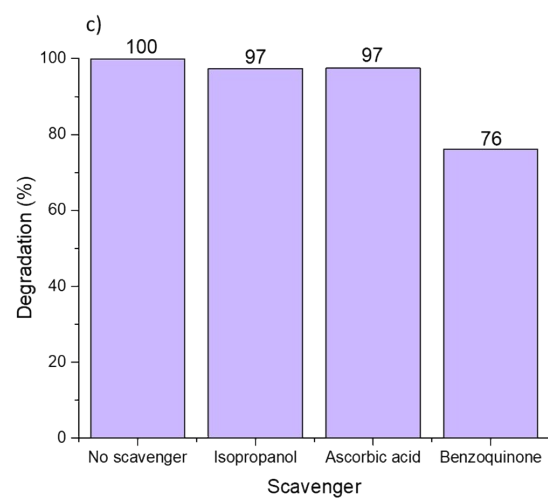

Fig. S12. Scavenger experiments for MP degradation using  $\text{BiOCl}_{0.9}\text{I}_{0.1}$  a) single-contaminant (final time = 80 min) and b) ternary-contaminant system (final time = 40 min). c) Scavenger experiments for CIP degradation using  $\text{BiOCl}_{0.9}\text{I}_{0.1}$  in the ternary-contaminant system (final time = 40 min).

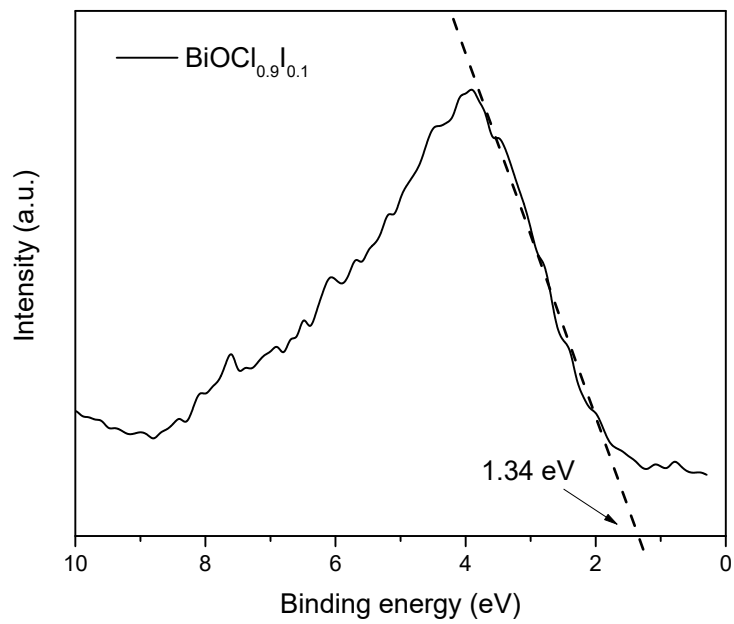

Fig. S13. XPS spectrum of the valence band potential ( $E_{\text{VB-XPS}}$ ) for  $\text{BiOCl}_{0.9}\text{I}_{0.1}$

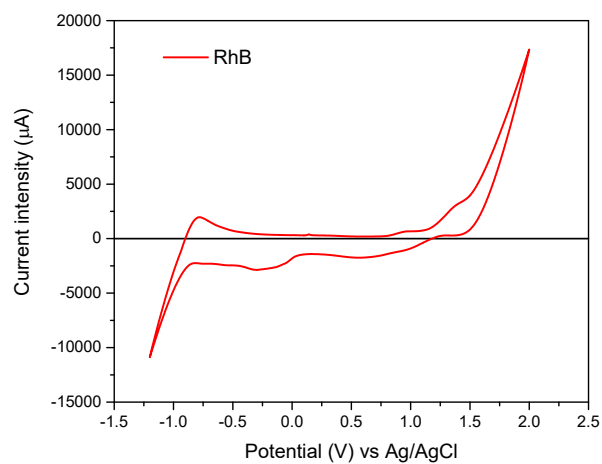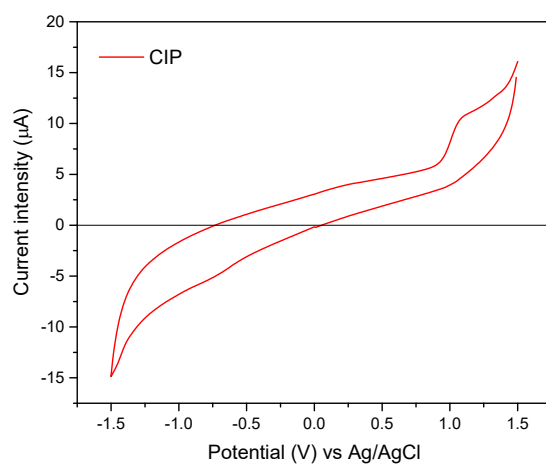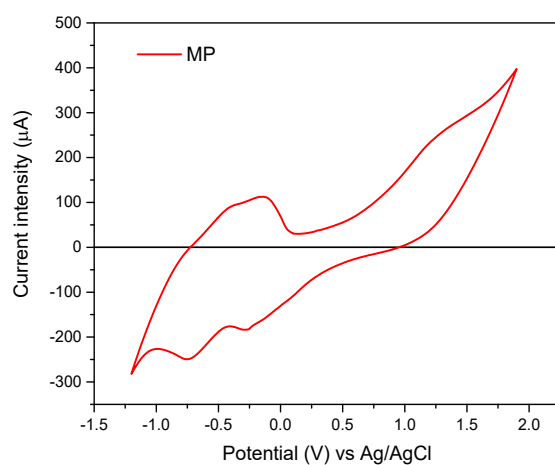

Fig. S14. CV of RhB, CIP and MP in PBS at pH 7.4 using Pt as both the working and counter electrodes and Ag/AgCl/KCl 3M as a reference electrode.



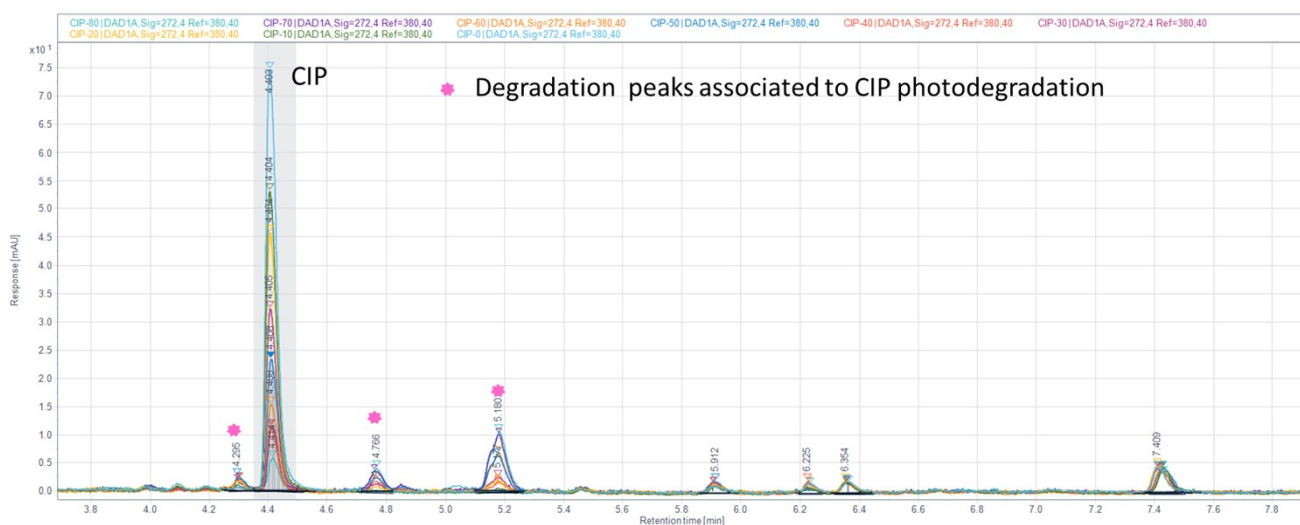

Figure S15. HPLC chromatogram of the CIP degradation in the single system at 272 nm using  $\text{BiOCl}_{0.9}\text{I}_{0.1}$ .

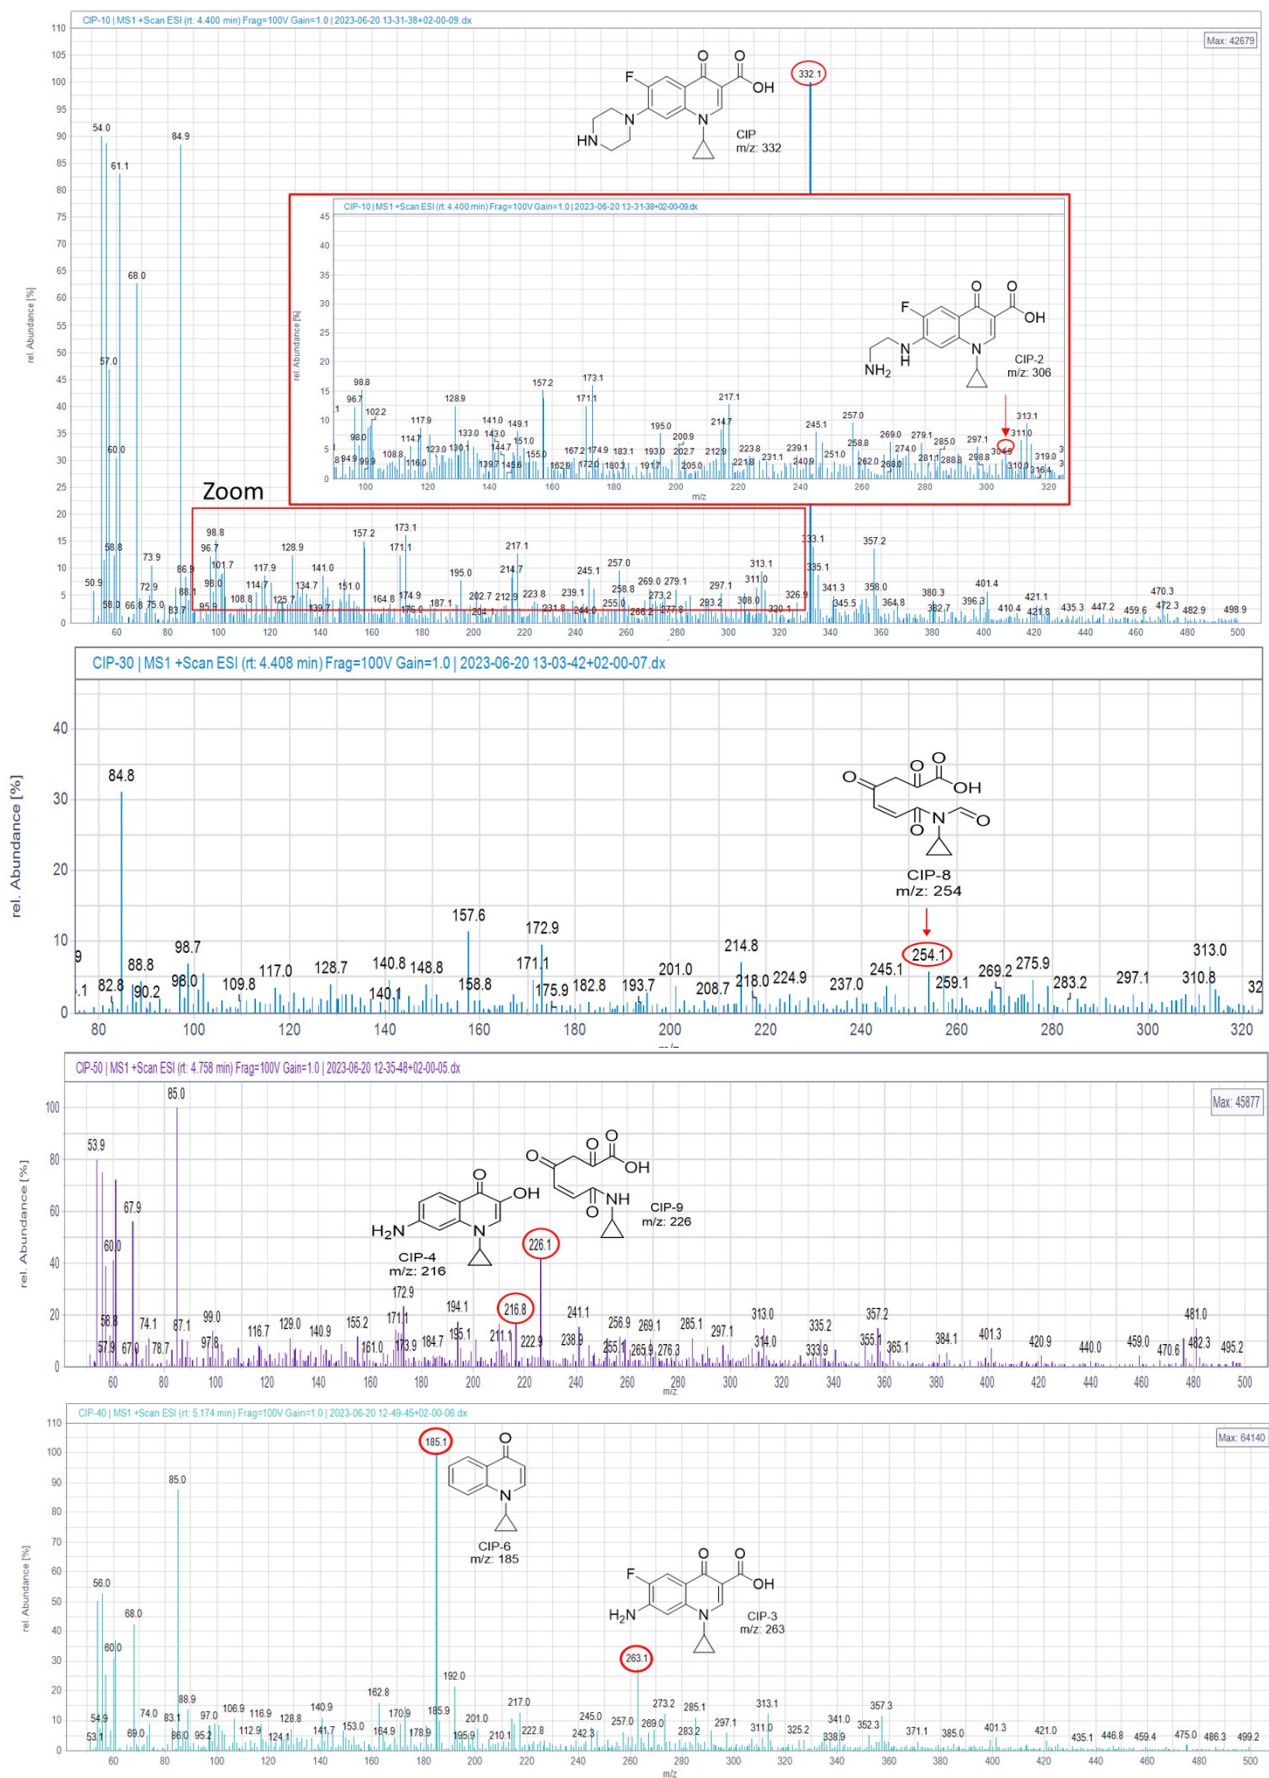

Fig. S16. LC-MS spectra of the CIP degradation in the single system using  $\text{BiOCl}_{0.9}\text{I}_{0.1}$ .

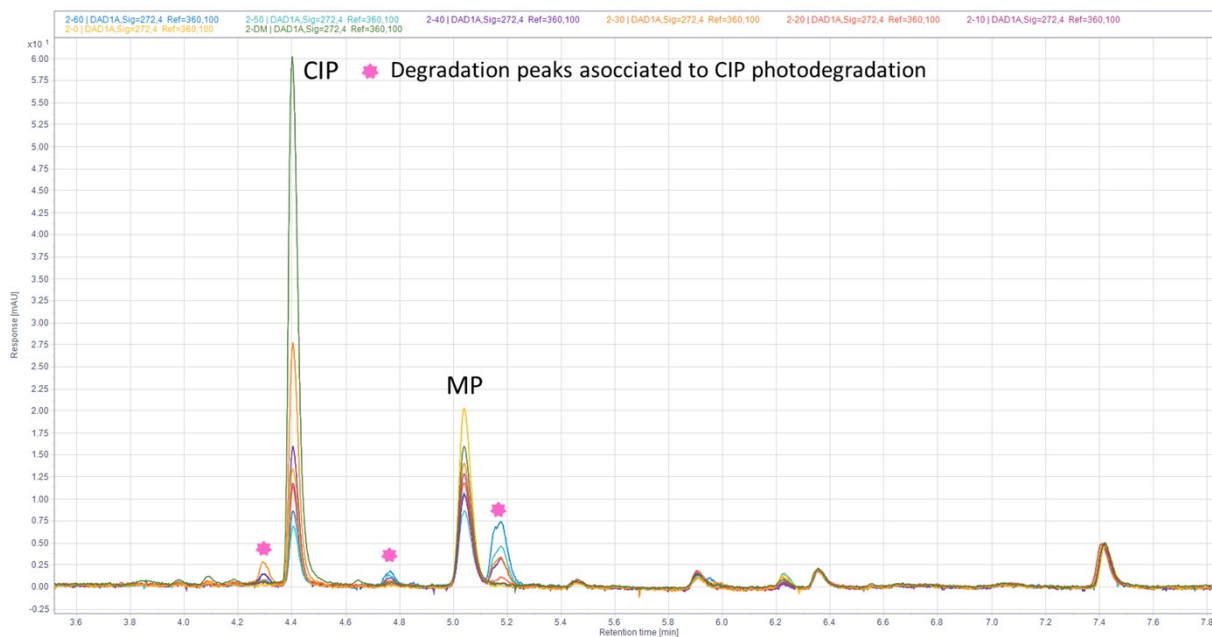

Fig. S17. HPLC chromatogram of the CIP degradation in the binary-contaminant system (CIP/MP) at 272 nm using  $\text{BiOCl}_{0.9}\text{I}_{0.1}$ .

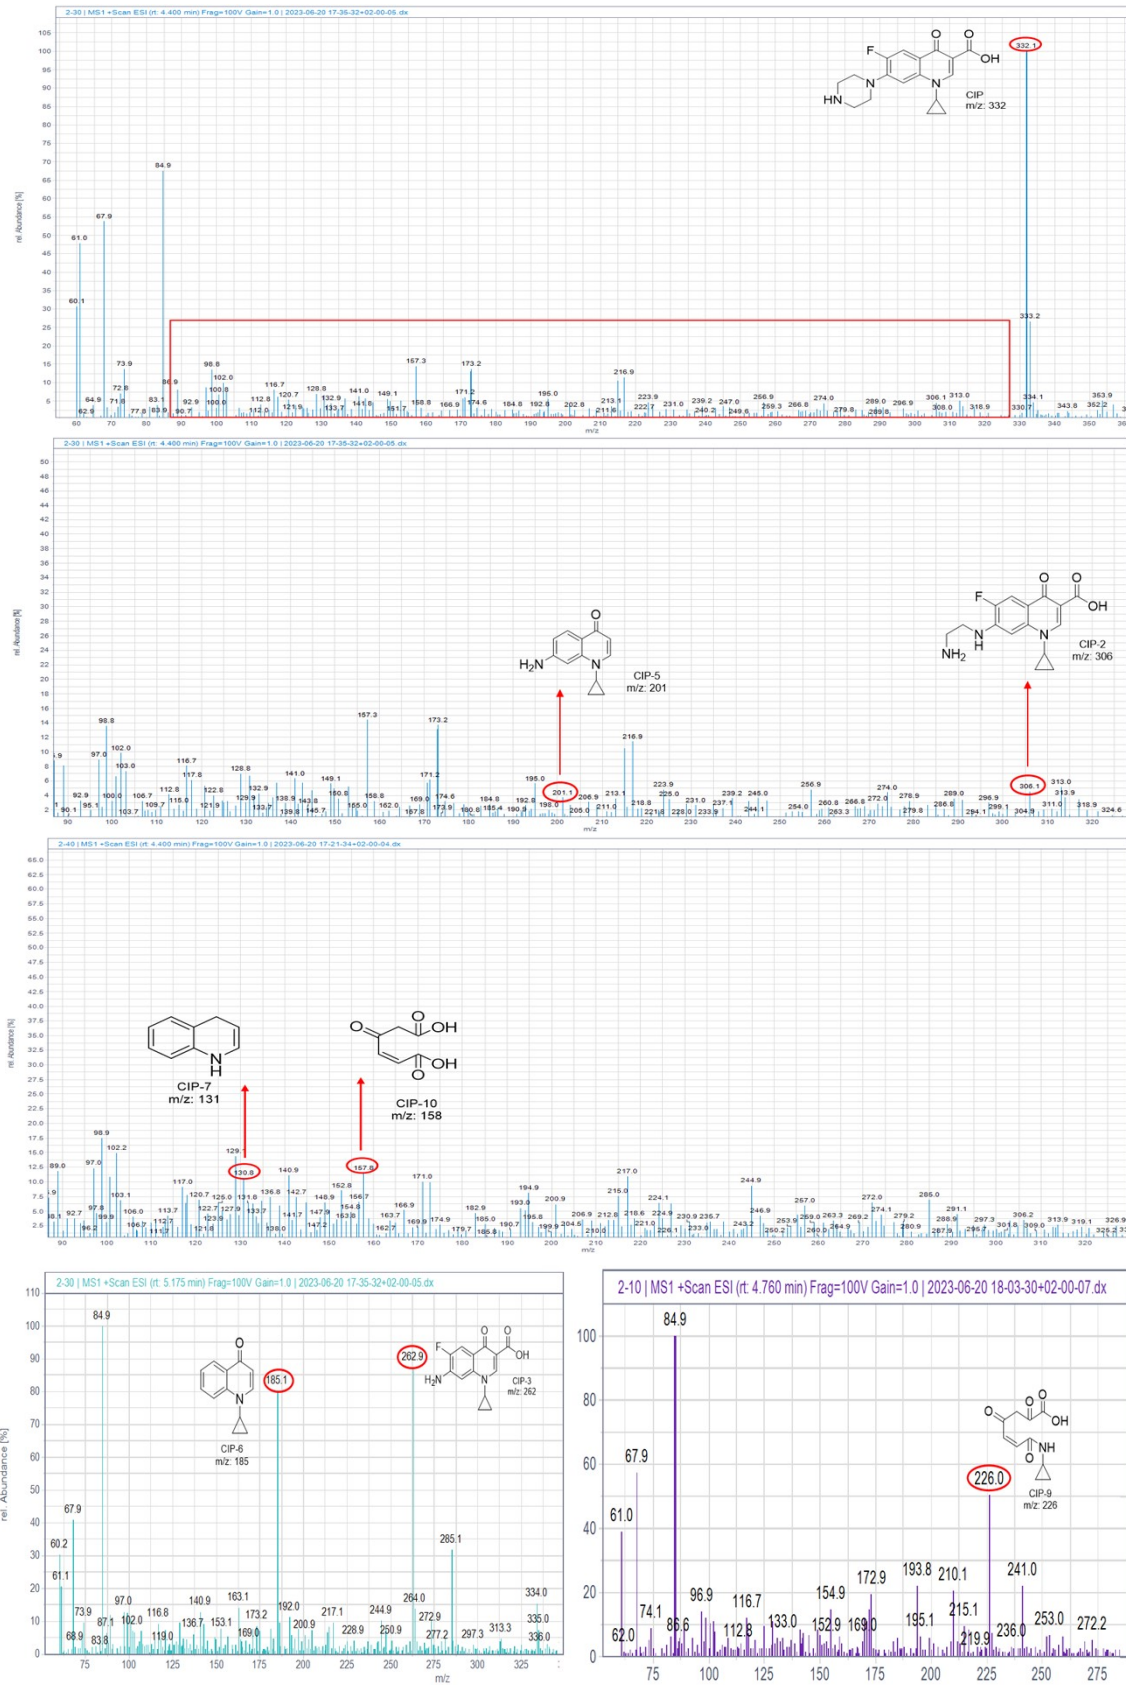

Fig. S18. LC-MS spectra of the CIP degradation in the binary-contaminant system (CIP/MP) using  $\text{BiOCl}_{0.9}\text{I}_{0.1}$

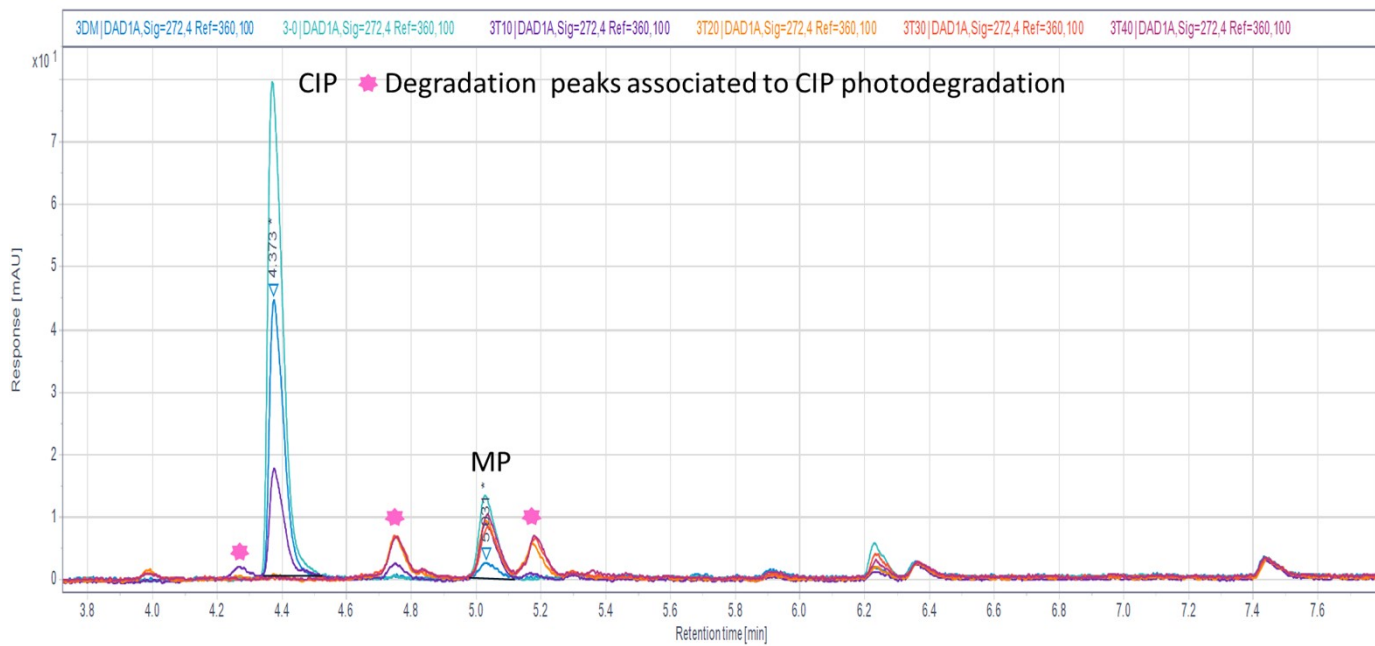

Fig. S19. HPLC chromatogram of the CIP degradation in the ternary-contaminant system (CIP/MP/RhB) at 272 nm using  $\text{BiOCl}_{0.9}\text{I}_{0.1}$ .

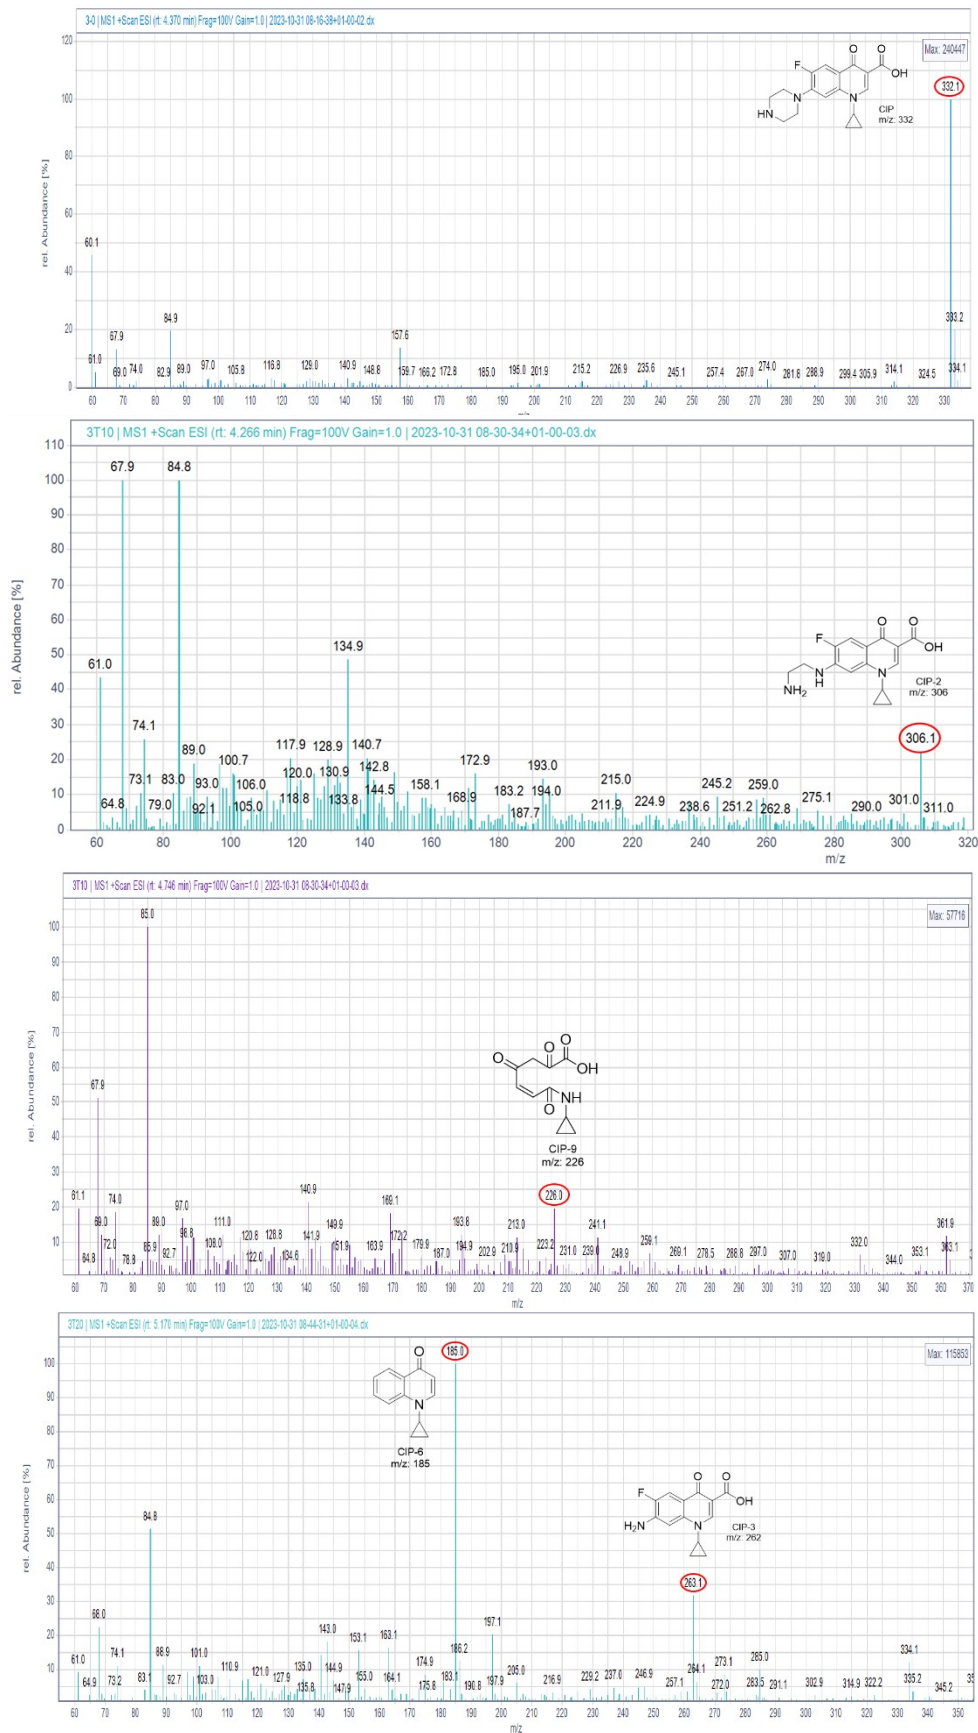

Fig. S20. LC-MS spectra of the CIP photodegradation in the ternary-contaminant system (CIP/MP/RhB) using  $\text{BiOCl}_0.9\text{I}_0.1$ .

Table S3. Predicted toxicity of the CIP molecule and their degradation intermediates

| Molecules | MS/MZ values | Molecular formula                                              | Fish (LC <sub>50</sub> ) (mg/L) |                  | Daphnid (LC <sub>50</sub> ) (mg/L) |                  |
|-----------|--------------|----------------------------------------------------------------|---------------------------------|------------------|------------------------------------|------------------|
|           |              |                                                                | Predicted toxicity              | Toxic/non-toxic* | Predicted toxicity                 | Toxic/non-toxic* |
| CIP       | 331          | C <sub>17</sub> H <sub>18</sub> FN <sub>3</sub> O <sub>3</sub> | 0.2                             | Very toxic       | N/A                                | ---              |
| CIP-2     | 305          | C <sub>15</sub> H <sub>16</sub> FN <sub>3</sub> O <sub>3</sub> | 0.1                             | Very toxic       | 11.98                              | Harmful          |
| CIP-3     | 262          | C <sub>13</sub> H <sub>11</sub> FN <sub>2</sub> O <sub>3</sub> | 0.2                             | Very toxic       | 23.5                               | Harmful          |
| CIP-4     | 216          | C <sub>12</sub> H <sub>12</sub> N <sub>2</sub> O <sub>2</sub>  | 2.9                             | Toxic            | 21.75                              | Harmful          |
| CIP-5     | 200          | C <sub>12</sub> H <sub>12</sub> N <sub>2</sub> O               | 0.4                             | Very toxic       | 8.38                               | Toxic            |
| CIP-6     | 185          | C <sub>12</sub> H <sub>11</sub> NO                             | 2.5                             | Toxic            | 4.17                               | Toxic            |
| CIP-7     | 131          | C <sub>9</sub> H <sub>9</sub> N                                | 24.3                            | Harmful          | 95.75                              | Harmful          |
| CIP-8     | 253          | C <sub>11</sub> H <sub>11</sub> NO <sub>6</sub>                | 36.11                           | Harmful          | 472.94                             | Not harmful      |
| CIP-9     | 225          | C <sub>10</sub> H <sub>11</sub> NO <sub>5</sub>                | 45.72                           | Harmful          | 568.53                             | Not harmful      |
| CIP-10    | 158          | C <sub>6</sub> H <sub>6</sub> O <sub>5</sub>                   | 118.95                          | Not harmful      | 433.57                             | Not harmful      |

\* Standard toxicity range – Very Toxic - LC<sub>50</sub> < 1; Toxic – 1 < LC<sub>50</sub> < 10; Harmful – 10 < LC<sub>50</sub> < 100; Not Harmful LC<sub>50</sub> > 100.

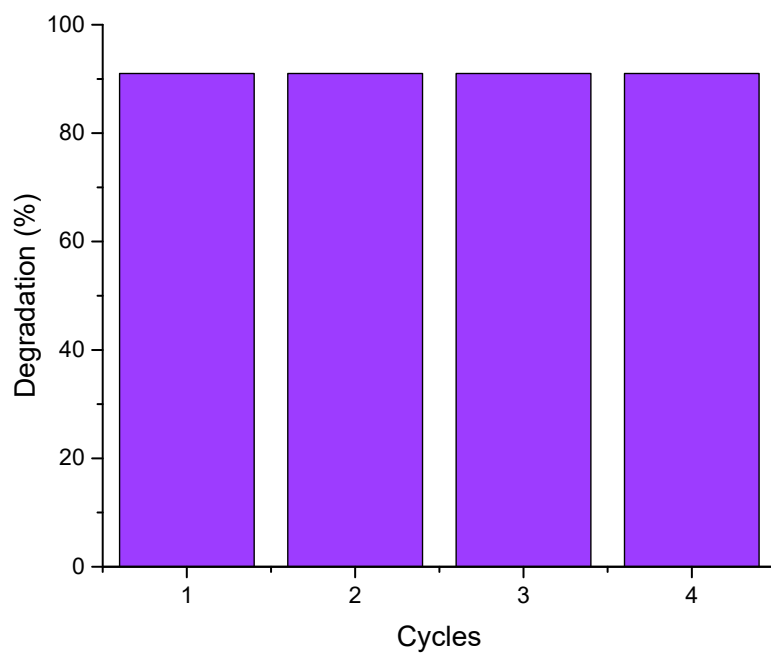

Figure S21. Recycling of  $\text{BiOCl}_{0.9}\text{I}_{0.1}$  for MP degradation.

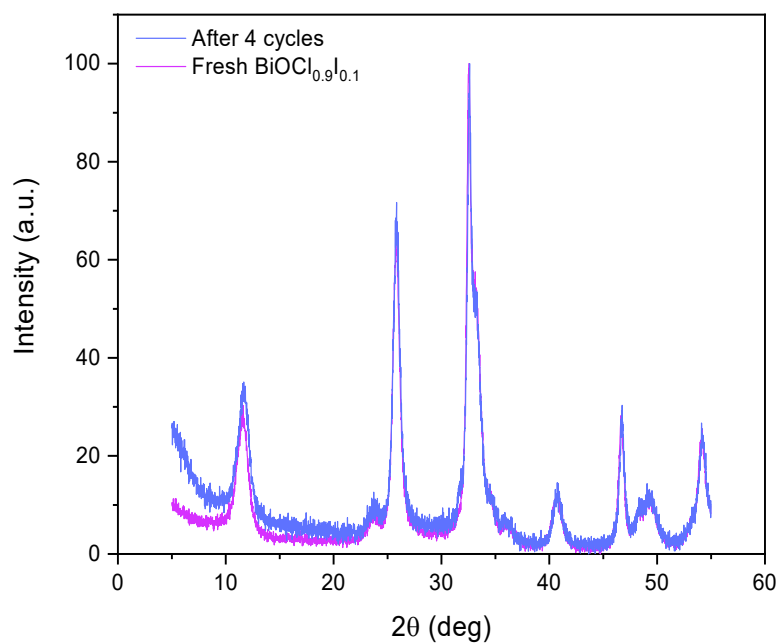

Fig S22. PXRD patterns of fresh  $\text{BiOCl}_{0.9}\text{I}_{0.1}$  material and after 4 cycles of MP photodegradation



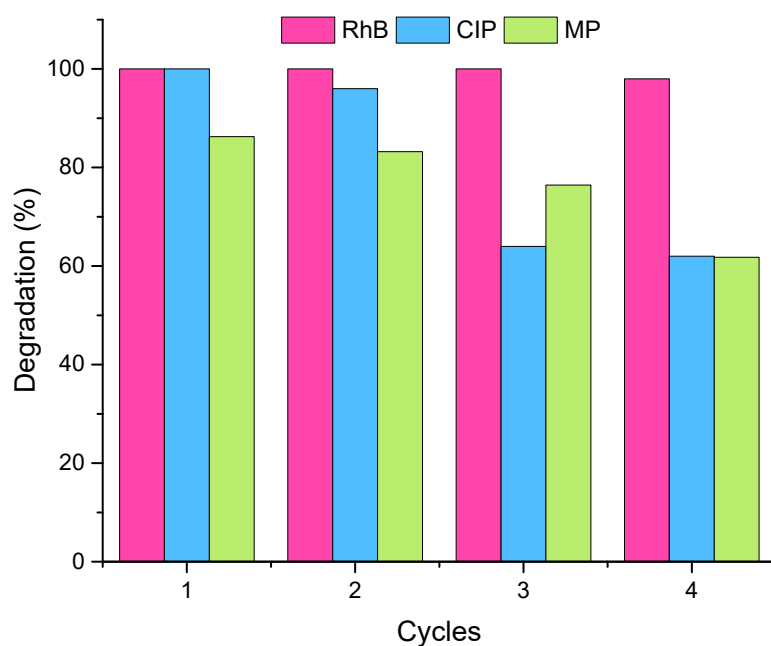

Figure S23. Recycling of  $\text{BiOCl}_{0.9}\text{I}_{0.1}$  in the ternary-contaminant system (CIP/MP/RhB) (final time = 40 min)

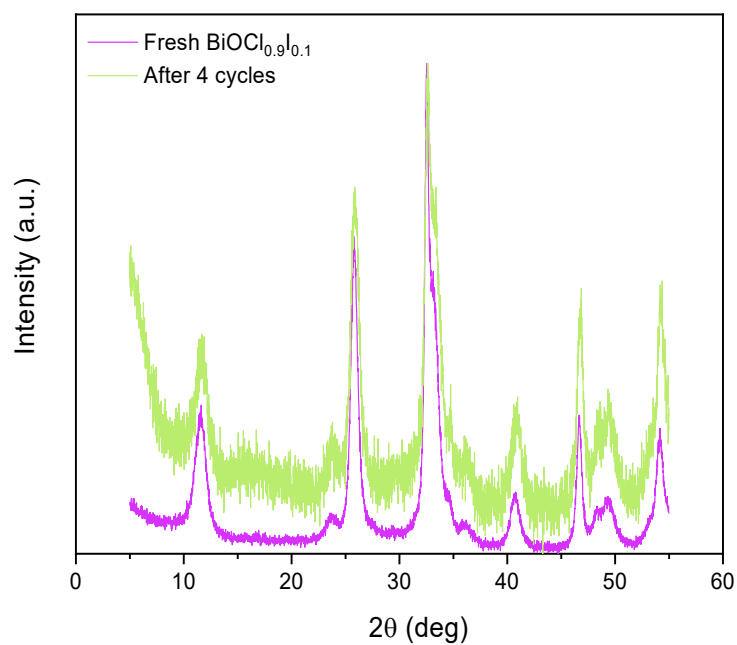

Fig S24. PXRD patterns of  $\text{BiOCl}_{0.9}\text{I}_{0.1}$  before and after 4 cycles in the ternary-contaminant system (CIP/MP/RhB).

## References

1. Suliman, M. A.; Gondal, M. A.; Dastageer, M. A.; Chuah, G.; Basheer, C., *Photochem. Photobiol.* 2019, **95**, 1485-1494.
2. Kumar, A.; Shalini; Sharma, G.; Naushad, M.; Kumar, A.; Kalia, S.; Guo, C.; Mola, G. T., *J. Photochem. Photobiol. A.* 2017, **337**, 118-131.
3. Xiao, X.; Lu, M.; Nan, J.; Zuo, X.; Zhang, W.; Liu, S.; Wang, S., *Appl. Catal., B*, 2017, **218**, 398-408.
4. Tashkandi, N. Y.; Albukhari, S. M.; Ismail, A. A., *Environ. Sci. Pollut. Res.* 2022, **29**, 78472-78482.
5. Su, X.; Wu, D., *Mat. Sci. Semicond. Process.* 2018, **80**, 123-130.
6. Lai, C.; Zhang, M.; Li, B.; Huang, D.; Zeng, G.; Qin, L.; Liu, X.; Yi, H.; Cheng, M.; Li, L.; Chen, Z.; Chen, L., *Chem. Eng. J.* 2019, **358**, 891-902.
7. Qin, T.; Wei, J.; Zhou, C.; Zeng, X.; Zhou, J.; Li, Y., *Sep. Purif. Technol.* 2023, **317**, 123793.
8. Abid, M. Z.; Ilyas, A.; Rafiq, K.; Rauf, A.; Nadeem, M. A.; Waseem, A.; Hussain, E., *Environ. Sci. Water Res. Technol.* 2023, **9**, 2238-2252.
